# Supplementary material for: Holocene coastal evolution preceded the expansion of paddy field rice farming
Source: PubMed Central journal article supplement — Proc Natl Acad Sci U S A. 2020 Sep 14;117(39):24138–43. doi: 10.1073/pnas.1919217117 (PMC7533829; doi:10.1073/pnas.1919217117), 2020-09-14
Supplement: pnas.1919217117.sapp.pdf [file pnas.1919217117.sapp.pdf]

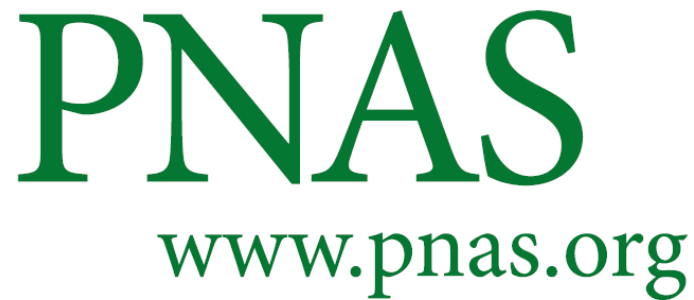

Supplementary Information for

**Holocene Coastal Evolution Preceded the Expansion of Paddy Field Rice Farming**

Ting Ma, Barry V. Rolett \*, Zhuo Zheng \*, Yongqiang Zong

\*Correspondence author: Barry V. Rolett, Zhuo Zheng

**Email:** rolett@hawaii.edu; eeszzhuo@mail.sysu.edu.cn

**This PDF file includes:**

Figures S1 to S4  
Tables S1 to S3  
Legend for Dataset S1  
SI References

**Other supplementary materials for this manuscript include the following:**

Dataset S1

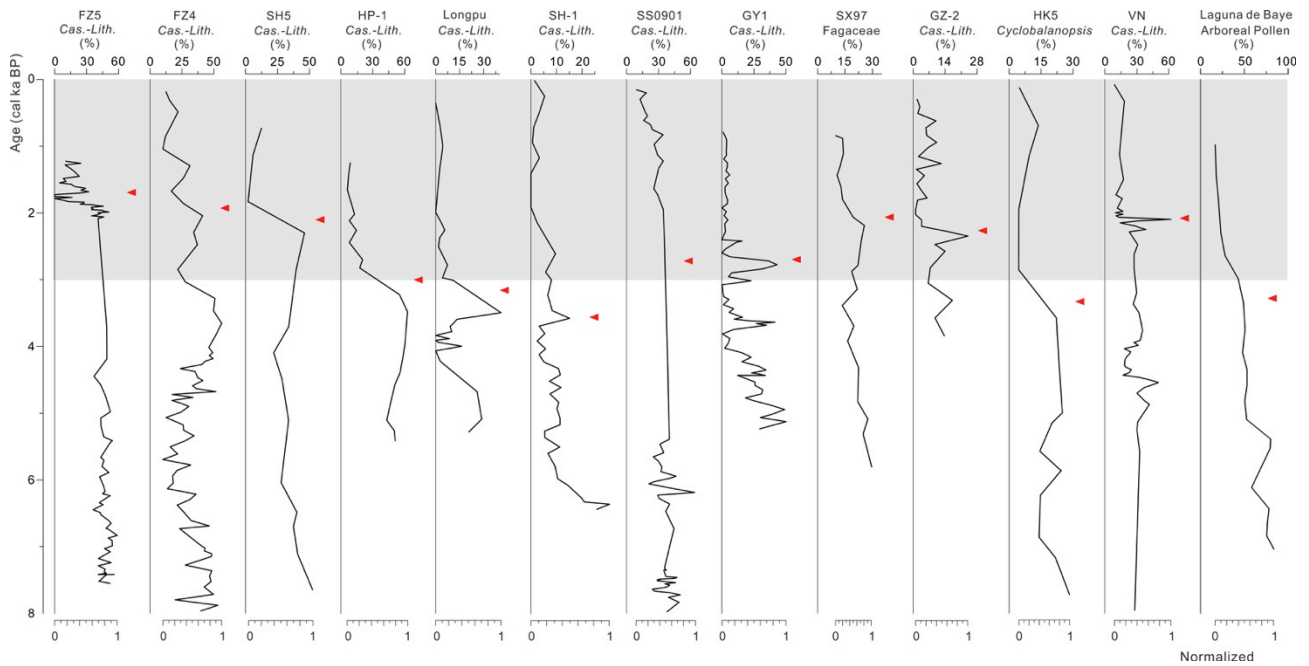

**Fig. S1.**

Time series of pollen data for major tree taxa. Sediment core locations are listed in Table S1. Gray band highlights the time period after 3 ka. *Cas. - Lith.*, *Castanopsis - Lithocarpus*. Red arrows indicate the start of notable declines in the frequency of tree pollen. For each record, the percentage of major tree taxa was normalized independently to values between 0 and 1; the transition to data consistently lower than 0.5 is marked by the red arrows.

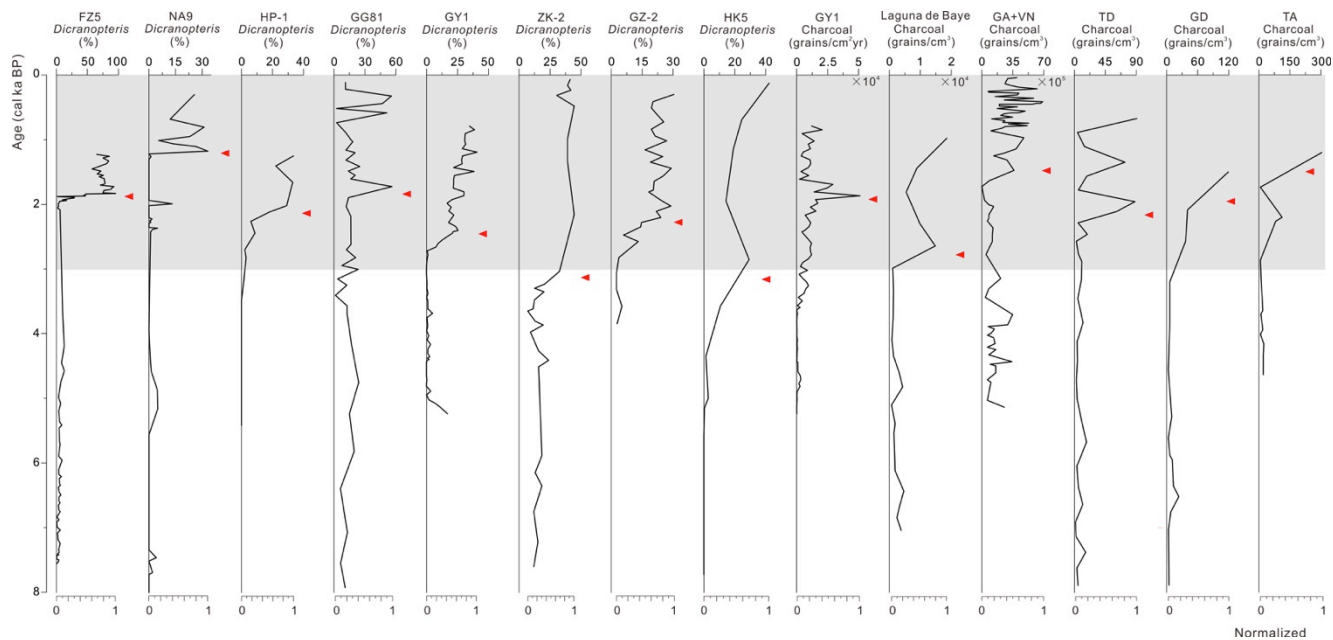

**Fig. S2.**

Time series of *Dicranopteris* spore relative frequencies and charcoal particle concentrations. Sediment core locations are listed in Table S1. Gray band highlights the time period after 3 ka. Red arrows indicate the start of notable increases in the frequency of *Dicranopteris* and charcoal particles. For each record, the percentage of *Dicranopteris* or the concentration of charcoal particles was normalized independently to values between 0 and 1; the transition to data higher than 0.5 is marked by the red arrows.

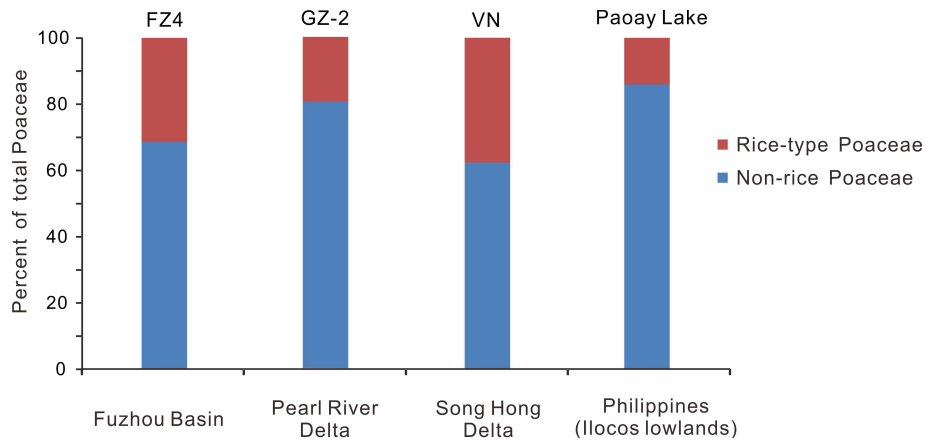

**Fig. S3.**

Rice-type Poaceae pollen quantified as a proportion of all Poaceae pollen for representative records from the Fuzhou Basin (China), the Pearl River Delta (China), the Song Hong Delta (Vietnam) and the Paoay Lake (Luzon, Philippines). Data is for the 2.5 - 2 ka time interval. See Fig. 2 for data showing total Poaceae pollen counts, for the broader time interval from 8 ka until recent centuries.

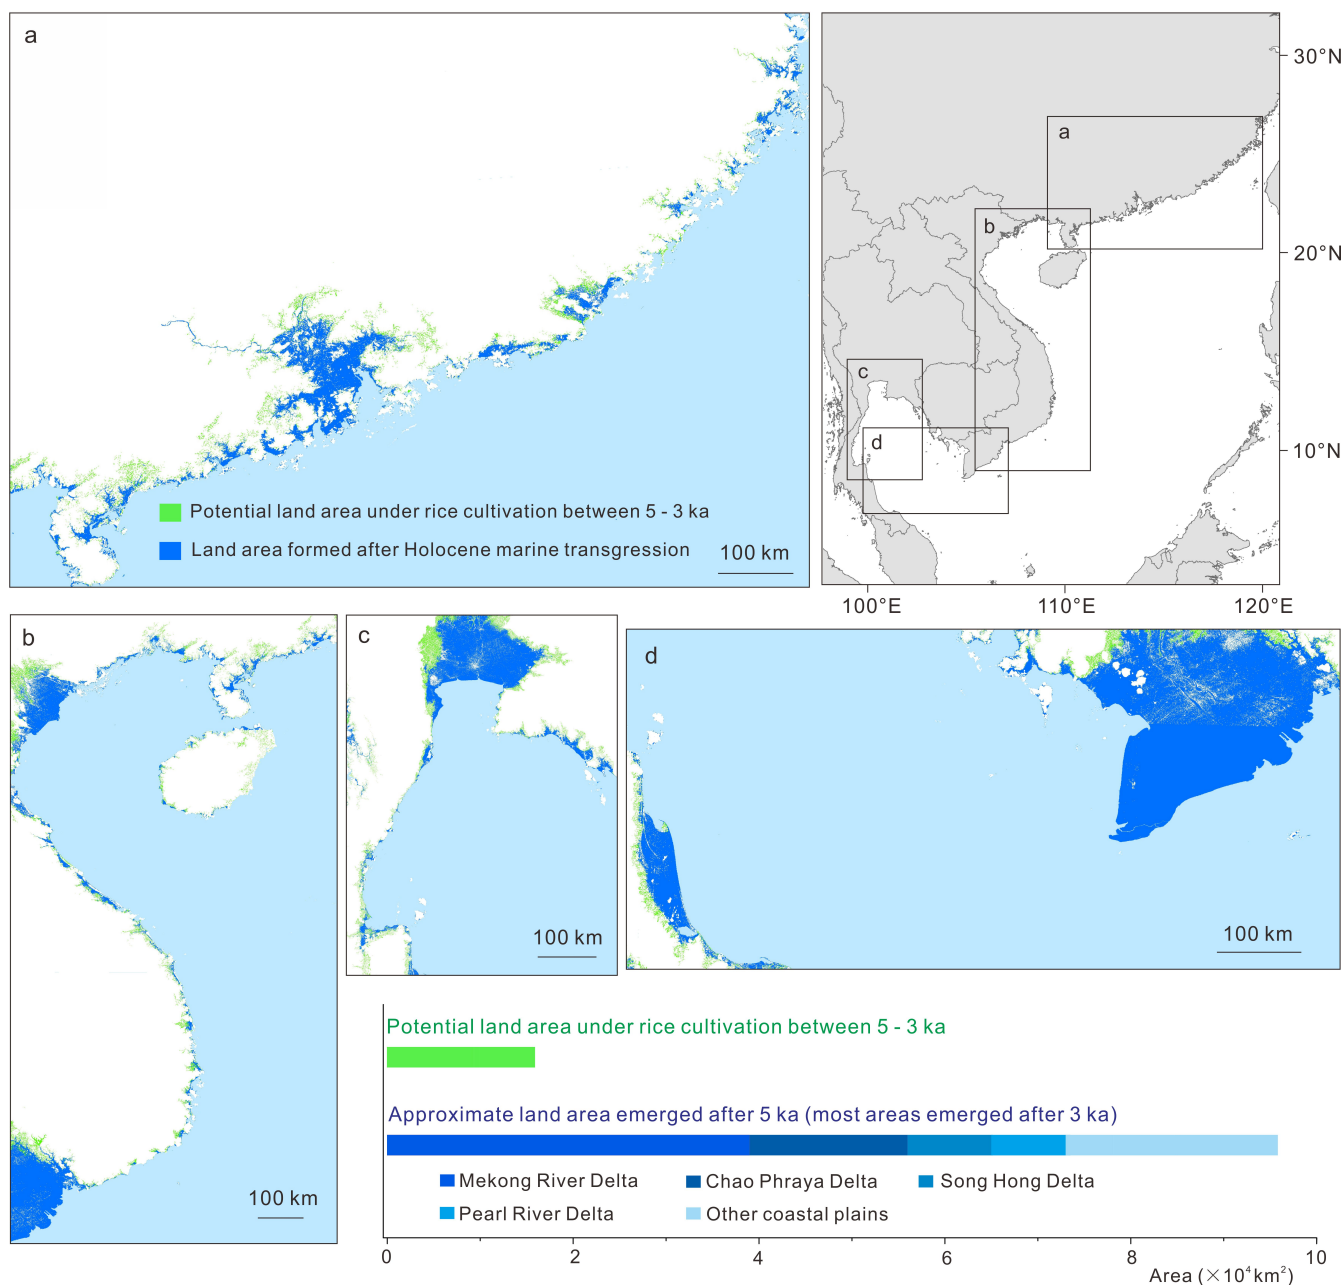

**Fig. S4.**

Estimation of the approximate area of low-lying freshwater flatlands suitable for wet rice cultivation in coastal areas (~200 km from the current coastline) in South China (including Fujian, Guangdong, Guangxi Province), Vietnam and Thailand. Maps show the location and geographic extent of low-lying freshwater flatlands, estimated at two periods in time: ~5 - 3 ka and the present. The green areas show the approximate extent of low-lying freshwater flatlands suitable for wetland rice cultivation at ~5 - 3 ka. This area represents land  $\leq 20$  m in elevation and with a slope of  $\leq 0.5^\circ$ . These criteria are often associated with very flat landforms of downstream floodlands (1), conditions that favor the formation of freshwater marshes (2). Blue areas approximate the extent of land that is suitable now for paddy-field rice agriculture, but which was formed after the Holocene marine transgression. Blue areas were modeled through paleoenvironmental reconstructions using sediment core data for the Songkhla-Pattalung plain (Thailand),

Haifeng plain (China) and major deltas illustrated in Fig. 4. The combined extent of both the green and blue areas represents an approximate minimum surface area of low-lying freshwater flatlands suitable for wet rice cultivation at the present; most of the blue area emerged after 3 ka.

**Table S1.** List of pollen records for land cover change and associated sediment cores used in this study

| No. | Site name      | Location                     | Reference                                  |
|-----|----------------|------------------------------|--------------------------------------------|
| 1   | FZ5            | E119.1300556°; N26.11466667° | This study                                 |
| 2   | FZ4            | E119.3571389°; N26.05786111° | (2); this study (data of rice-type pollen) |
| 3   | NA9            | E117.13205°; N23.44898333°   | This study                                 |
| 4   | SH5            | E116.7105159°; N23.42350044° | (3)                                        |
| 5   | SH6            | E116.6924417°; N23.37723037° | (3)                                        |
| 6   | HP-1           | E116.4449149°; N23.26670636° | (4)                                        |
| 7   | Longpu         | E112.6597222°; N23.445°      | This study                                 |
| 8   | SH-1           | E112.718°; N23.342°          | This study                                 |
| 9   | SS0901         | E112.8416667°; N23.16805556° | (5)                                        |
| 10  | GG81           | E113.492708°; N23.010318°    | (6)                                        |
| 11  | GY1            | E112.34045°; N22.9012°       | (7)                                        |
| 12  | ZK-2           | E114.6547513°; N22.7543015°  | (4)                                        |
| 13  | SX97           | E113.7783333°; N22.75277778° | (4)                                        |
| 14  | GZ-2           | E113.5138889°; N22.70555556° | (8, 9)                                     |
| 15  | HK5            | E113.0269333°; N21.99490278° | (10)                                       |
| 16  | VN             | E106.3775°; N20.41027778°    | (11, 12)                                   |
| 17  | GA             | E106.5158333°; N20.25722222° | (11, 12)                                   |
| 18  | Paoay Lake     | E120.5333333°; N18.11666667° | (13)                                       |
| 19  | Laguna de Baye | E121.006°; N14.518°          | (13)                                       |
| 20  | BMR2           | E101.094°; N13.502°          | (14, 15)                                   |
| 21  | GD             | E105.86085°; N10.67026667°   | (16)                                       |
| 22  | TD             | E106.2154667°; N10.66218333° | (16)                                       |
| 23  | TA             | E106.3864833°; N10.52386667° | (16)                                       |

**Table S2:** List of sediment records used in this study to show the coastal depositional environment change

| Site name | Location                     | Proxy                  | Reference  |
|-----------|------------------------------|------------------------|------------|
| GZ-2      | E113.5138889°; N22.70555556° | foraminifera; mangrove | (9)        |
| PD        | E113.4764833°; N22.8946°     | foraminifera           | (17)       |
| JT        | E113.4888889°; N23.00805556° | foraminifera           | (18)       |
| PRD04*    | E113.1939°; N22.4897°        | foraminifera           | (19)       |
| PRD05*    | E113.1839°; N22.52333°       | foraminifera           | (20, 21)   |
| PRD16     | E113.5458333°; N22.87444444° | foraminifera           | (22)       |
| PRD17     | E113.4416667°; N22.85194444° | foraminifera           | (23)       |
| QZK4      | E113.3957306°; N22.72055°    | foraminifera           | (24)       |
| ZK203-2   | E113.4562194°; N22.67218889° | foraminifera           | (25)       |
| ZK201-2   | E113.4568528°; N22.67799722° | foraminifera           | (25)       |
| QZK1      | E113.2078972°; N22.97641667° | foraminifera           | (21)       |
| ZK13      | E113.4861°; N22.6114°        | foraminifera           | (26)       |
| PRD20     | E113.2563889°; N22.865°      | foraminifera           | (23)       |
| CN-01     | E116.48583°; N23.20806°      | foraminifera           | (27)       |
| HF-1      | E115.26528°; N22.88222°      | foraminifera           | This study |
| CH2       | E116.81°; N23.42°            | foraminifera; mangrove | (3)        |
| SH5       | E116.7105159°; N23.42350044° | foraminifera; mangrove | (3)        |
| ZK201     | E119.46°; N26.002°           | foraminifera           | (28)       |
| M3        | E119.547°; N26.092°          | foraminifera           | (29)       |
| M184      | E113.672024°; N23.00829443°  | diatom                 | (30)       |
| D6        | E113.3660454°; N22.21899627° | diatom                 | (31)       |
| JT81      | E113.492708°; N23.01031844°  | diatom                 | (30)       |
| PK16      | E113.6734488°; N23.08045246° | diatom                 | (30)       |
| D13       | E113.502499°; N22.980934°    | diatom                 | (30)       |
| SDZK01    | E113.2061°; N22.919°         | diatom                 | (32)       |
| FZ5       | E119.1300556°; N26.11466667° | diatom                 | This study |
| HK25      | E 116.71°; N 23.46°          | diatom                 | (33)       |
| E3        | E116.63°; N23.65°            | diatom                 | (33)       |
| SH6       | E116.6924417°; N23.37723037° | mangrove               | (3)        |
| VN*       | E106.3775°; N20.41027778°    | mangrove               | (12)       |
| GA*       | E106.5158333°; N20.25722222° | mangrove               | (12)       |
| TD        | E106.2154667°; N10.66218333° | mangrove               | (16)       |
| GD        | E105.86085°; N10.67026667°   | mangrove               | (16)       |
| TA        | E106.3864833°; N10.52386667° | mangrove               | (16)       |
| TN-3      | E100.15°; N7.78°             | mangrove               | (34)       |
| NB*       | E106.4525°; N20.33472°       | None                   | (35)       |
| HV*       | E106.3302778°; N20.224167°   | None                   | (35)       |



|        |                              |      |      |
|--------|------------------------------|------|------|
| PIT1*  | E100.65°; N13.5583°          | None | (36) |
| SITE3* | E100.587°; N13.56983°        | None | (36) |
| TV1*   | E106.1936111°; N9.851111111° | None | (37) |
| BT3*   | E106.6288889°; N10.01805556° | None | (37) |
| PRD10* | E113.24°; N22.73°            | None | (38) |

\*Shown as accumulation curves (age–depth plots) in Fig. 4D.

**Table S3: Radiocarbon dating used in this paper**

| Site name | Depth (cm) | Dated material       | Radiocarbon age, yr BP | Calibrated age, cal. yr BP (95%) | Lab ID      | Reference  |
|-----------|------------|----------------------|------------------------|----------------------------------|-------------|------------|
| FZ4       | 1082       | Single piece of wood | 190 ± 35               | 136-225                          | BA 07690    | (2)        |
| FZ4       | 1490       | Single piece of wood | 3710 ± 15              | 3985-4054                        | Beta 366744 | (2)        |
| FZ4       | 1884       | Single piece of wood | 4355 ± 27              | 4853-4974                        | XA 07691    | (2)        |
| FZ4       | 2632       | Single piece of wood | 7190 ± 20              | 7956-8033                        | Beta 366745 | (2)        |
| FZ4       | 2975       | Organic lens         | 7400 ± 25              | 8176-8313                        | OS-71398    | (2)        |
| FZ4       | 3224       | Single piece of wood | 7345 ± 45              | 8025-8218                        | BA 07692    | (2)        |
| FZ4       | 3406       | Single piece of wood | 7979 ± 31              | 8716-8997                        | XA7235      | (2)        |
| FZ5       | 739        | Single piece of wood | 2010 ± 40              | 1877-2060                        | BA 07693    | (39)       |
| FZ5       | 1000       | Single piece of wood | 6145 ± 40              | 6946-7160                        | BA 07694    | (39)       |
| FZ5       | 1126       | Single piece of wood | 6640 ± 25              | 7484-7569                        | OS-71399    | (39)       |
| NA9       | 145        | Plant remains        | 1380 ± 30              | 1275-1337                        | Beta 314476 | This study |
| NA9       | 435        | Plant remains        | 2340 ± 30              | 2318-2433                        | Beta 314477 | This study |
| NA9       | 1134       | Charcoal             | 7620 ± 30              | 8380-8447                        | Beta 314478 | This study |
| HF-1      | 486        | Shell                | 2330 ± 30              | 1873-2012                        | Beta 354592 | This study |
| HF-1      | 580        | Shell                | 3390 ± 30              | 3185-3333                        | Beta 337506 | This study |
| HF-1      | 741        | Shell                | 5350 ± 30              | 5628-5794                        | Beta 337507 | This study |
| CN-01     | 253        | Shell                | 3050 ± 30              | 2755-2880                        | Beta 474667 | This study |
| CN-01     | 410        | Shell                | 5680 ± 30              | 6000-6167                        | Beta 347605 | (27)       |
| HK25      | 425        | Organic clay         | 1840 ± 85              | 1566-1944                        | KWG-302     | (33)       |
| HK25      | 965        | Organic clay         | 5220 ± 220             | 5580-6443                        | KWG-32      | (33)       |
| SDZK01    | 500        | Bulk organic         | 2455 ± 28              | 2375-2697                        | GZ3927      | (32)       |
| SDZK01    | 780        | Bulk organic         | 2528 ± 29              | 2502-2737                        | GZ3928      | (32)       |
| SDZK01    | 1200       | Bulk organic         | 6429 ± 45              | 7277-7423                        | GZ3929      | (32)       |
| SH-1      | 178        | Wood                 | 3729 ± 36              | 3981-4210                        | XA4747      | This study |
| SH-1      | 409        | Wood                 | 5504 ± 30              | 6228-6387                        | GZ2659      | This study |
| SH-1      | 636        | Plant fragment       | 7941 ± 33              | 8649-8972                        | XA4857      | This study |
| Longpu    | 190        | Bulk organic         | 1250 ± 59              | 1057-1290                        | NA          | (40, 41)   |
| Longpu    | 221        | Bulk organic         | 3305 ± 29              | 3457-3589                        | GZ774       | (40, 41)   |
| Longpu    | 241        | Bulk organic         | 3375 ± 45              | 3494-3757                        | GZ775       | (40, 41)   |
| Longpu    | 261        | Bulk organic         | 3448 ± 27              | 3640-3819                        | GZ776       | (40, 41)   |
| Longpu    | 281        | Bulk organic         | 3456 ± 28              | 3644-3822                        | GZ777       | (40, 41)   |
| Longpu    | 301        | Bulk organic         | 3429 ± 29              | 3609-3812                        | GZ778       | (40, 41)   |
| Longpu    | 321        | Bulk organic         | 3537 ± 30              | 3722-3895                        | GZ779       | (40, 41)   |
| Longpu    | 341        | Bulk organic         | 3587 ± 27              | 3839-3964                        | GZ780       | (40, 41)   |
| Longpu    | 381        | Bulk organic         | 3642 ± 30              | 3883-4070                        | GZ781       | (40, 41)   |
| Longpu    | 401        | Bulk organic         | 3665 ± 30              | 3906-4082                        | GZ783       | (40, 41)   |
| Longpu    | 421        | Bulk organic         | 3673 ± 30              | 3915-4086                        | GZ784       | (75, 76)   |

|        |      |                  |            |            |             |          |
|--------|------|------------------|------------|------------|-------------|----------|
| Longpu | 441  | Bulk organic     | 3813 ± 31  | 4102-4345  | GZ785       | (40, 41) |
| Longpu | 481  | Bulk organic     | 4544 ± 30  | 5064-5309  | GZ787       | (40, 41) |
| TN-3   | 50   | NA               | NA         | 2350-2720  | NA          | (20)     |
| TN-3   | 300  | NA               | NA         | 7680-7880  | NA          | (34)     |
| TD     | 133  | Plant remains    | 2775 ± 35  | 2788-2949  | Poz-30916   | (16)     |
| TD     | 178  | Plant remains    | 5385 ± 35  | 6032-6275  | Poz-30915   | (16)     |
| GD     | 112  | Plant remains    | 4650 ± 40  | 5311-5554  | Poz-30911   | (16)     |
| GD     | 167  | Plant remains    | 5570 ± 35  | 6300-6405  | Poz-21312   | (16)     |
| GD     | 213  | Plant remains    | 6040 ± 40  | 6788-6986  | Poz-21313   | (16)     |
| TA     | 335  | Carbonate shells | 4420 ± 35  | 4476-4707  | Poz-21507   | (16)     |
| VN     | 250  | Peaty organic    | 1800 ± 40  | 1621-1823  | Beta 164811 | (12)     |
| VN     | 430  | Shell fragments  | 2310 ± 40  | 1830-2014  | Beta 164812 | (12)     |
| VN     | 1100 | Jointed bivalve  | 2590 ± 40  | 2158-2336  | Beta 164814 | (12)     |
| VN     | 1380 | Bivalve          | 3440 ± 40  | 3213-3397  | Beta 164816 | (12)     |
| VN     | 1600 | Wood             | 3630 ± 40  | 3851-4074  | Beta 164817 | (12)     |
| VN     | 1770 | Jointed bivalve  | 3990 ± 40  | 3881-4097  | Beta 164818 | (12)     |
| VN     | 2440 | Jointed bivalve  | 4420 ± 40  | 4457-4740  | Beta 164820 | (12)     |
| VN     | 2780 | Bivalve          | 4960 ± 40  | 5235-5427  | Beta 164821 | (12)     |
| VN     | 2980 | Bivalve          | 8070 ± 40  | 8426-8599  | Beta 164822 | (12)     |
| VN     | 3010 | Gastropod        | 8320 ± 50  | 8721-9001  | Beta 164824 | (12)     |
| GA     | 240  | Gastropod        | 130 ± 40   | NA         | Beta 164844 | (12)     |
| GA     | 1140 | Wood             | 290 ± 40   | 164-466    | Beta 164847 | (12)     |
| GA     | 1860 | Shell fragments  | 740 ± 40   | 299-456    | Beta 164848 | (12)     |
| GA     | 1980 | Bivalve          | 1030 ± 40  | 539-656    | Beta 164849 | (12)     |
| GA     | 2930 | Bivalve          | 1330 ± 40  | 783-942    | Beta 164852 | (12)     |
| GA     | 3350 | Echinoderm       | 1960 ± 50  | 1386-1624  | Beta 164854 | (12)     |
| GA     | 3440 | Jointed bivalve  | 2240 ± 40  | 1744-1933  | Beta 164855 | (12)     |
| GA     | 3620 | Bivalve          | 3420 ± 40  | 3195-3374  | Beta 164856 | (12)     |
| SH5    | 850  | Bulk organic     | 5584 ± 89  | 6215-6592  | NA          | (3)      |
| SH5    | 1700 | Bulk organic     | 8125 ± 128 | 8691-9406  | NA          | (3)      |
| SH5    | 2100 | Bulk organic     | 8780 ± 119 | 9550-10160 | NA          | (3)      |
| SH6    | 1000 | Bulk organic     | 2810 ± 67  | 2769-3076  | NA          | (3)      |
| SH6    | 2800 | Bulk organic     | 8085 ± 140 | 8610-9395  | NA          | (3)      |
| HP-1   | 300  | Bulk organic     | 2960 ± 160 | 2783-3501  | NA          | (4)      |
| ZK-2   | 200  | Bulk organic     | 3070 ± 100 | 2976-3477  | NA          | (4)      |
| ZK-2   | 550  | Bulk organic     | 5210 ± 100 | 5734-6240  | NA          | (4)      |
| ZK-2   | 700  | Bulk organic     | 8970 ± 350 | 9303-11098 | NA          | (4)      |
| SX97   | 396  | Bulk organic     | 957 ± 100  | 688-1056   | NA          | (42)     |
| SX97   | 1077 | Bulk organic     | 7080 ± 120 | 7686-8153  | NA          | (42)     |
| SS0901 | 296  | Bulk organic     | 4800 ± 40  | 5467-5603  | Beta 201319 | (26)     |

|            |      |                  |             |           |               |      |
|------------|------|------------------|-------------|-----------|---------------|------|
| SS0901     | 600  | Plant fragment   | 6460 ± 50   | 7273-7438 | Beta 291320   | (26) |
| SS0901     | 632  | Plant fragment   | 6580 ± 40   | 7432-7559 | Beta 290247   | (32) |
| SS0901     | 983  | Bulk organic     | 7480 ± 40   | 8202-8375 | NA            | (5)  |
| SS0901     | 1226 | Plant fragment   | 7677 ± 36   | 8410-8539 | NA            | (5)  |
| SS0901     | 1341 | Plant fragment   | 7961 ± 35   | 8698-8988 | NA            | (5)  |
| SS0901     | 1467 | Plant fragment   | 8037 ± 36   | 8779-9015 | NA            | (5)  |
| GG81       | 400  | Bulk organic     | 1310 ± 65   | 1078-1327 | NA            | (6)  |
| GG81       | 600  | Bulk organic     | 2430 ± 90   | 2336-2739 | NA            | (6)  |
| GG81       | 1110 | Bulk organic     | 3840 ± 95   | 3982-4053 | NA            | (6)  |
| GG81       | 1480 | Bulk organic     | 7340 ± 140  | 7932-8406 | NA            | (6)  |
| GY1        | 164  | Peat             | 1650 ± 30   | 1431-1616 | GZ5268        | (7)  |
| GY1        | 365  | Wood             | 3325 ± 30   | 3478-3630 | GZ5270        | (7)  |
| GY1        | 431  | Wood fragments   | 3915 ± 30   | 3478-3630 | GZ5272        | (7)  |
| GY1        | 496  | Wood fragments   | 4415 ± 30   | 4881-5232 | GZ5271        | (7)  |
| GZ-2       | 680  | Bulk organic     | 1817 ± 29   | 1645-1819 | GZ2089        | (9)  |
| GZ-2       | 1053 | Bulk organic     | 2452 ± 40   | 2368-2703 | GZ2090        | (9)  |
| GZ-2       | 1280 | Bulk organic     | 3698 ± 28   | 3950-4135 | GZ2091        | (9)  |
| HK5        | 400  | Bulk organic     | 3530 ± 100? | 3577-4083 | NA            | (10) |
| Paoay Lake | 111  | Organic fraction | 802 ± 24    | 684-757   | OxA-V-2023-43 | (13) |
| Paoay Lake | 161  | Organic fraction | 990 ± 35    | 802-958   | OZI043        | (13) |
| Paoay Lake | 222  | Organic fraction | 1299 ± 25   | 1186-1284 | OxA-V-2023-44 | (13) |
| Paoay Lake | 301  | Organic fraction | 1670 ± 30   | 1528-1681 | OZI044        | (13) |
| Paoay Lake | 361  | Organic fraction | 2208 ± 26   | 2153-2308 | OxA-V-2023-45 | (13) |
| Paoay Lake | 392  | Organic fraction | 2650 ± 190  | 2313-3239 | ANU-11918     | (13) |
| Paoay Lake | 440  | Organic fraction | 2870 ± 180  | 2698-3457 | ANU-11917     | (13) |
| Paoay Lake | 443  | Organic fraction | 3130 ± 60   | 3206-3460 | OZI047        | (13) |
| Paoay Lake | 511  | Organic fraction | 3187 ± 27   | 3369-3450 | OxA-V-2023-45 | (13) |
| Paoay Lake | 611  | Organic fraction | 4080 ± 60   | 4437-4807 | OZI043        | (13) |
| Paoay Lake | 650  | Organic fraction | 4360 ± 50   | 4852-5212 | OZI048        | (13) |
| Paoay Lake | 696  | Organic fraction | 4677 ± 29   | 5324-5561 | OxA-V-2023-47 | (13) |
| Paoay Lake | 750  | Organic fraction | 5567 ± 39   | 6294-6407 | WK-15837      | (13) |
| Paoay Lake | 810  | Organic fraction | 5940 ± 70   | 6632-6948 | OZI049        | (13) |
| BMR2       | 90   | Bulk organic     | 3960 ± 100  | 4118-4779 | OxA 1449      | (14) |
| BMR2       | 398  | Bulk organic     | 6560 ± 100  | 7274-7595 | OxA 1360      | (14) |
| BMR2       | 662  | Bulk organic     | 6610 ± 140  | 7253-7728 | OxA 1361      | (14) |
| PRD05      | 480  | NA               | 1915 ± 200  | 1418-2328 | NA            | (20) |
| PRD05      | 520  | NA               | 2065 ± 180  | 1618-2558 | NA            | (20) |
| PRD05      | 610  | NA               | 2355 ± 150  | 2045-2750 | NA            | (20) |
| PRD05      | 1060 | NA               | 2955 ± 160  | 2762-3453 | NA            | (20) |
| PRD05      | 1170 | NA               | 3681 ± 94   | 3759-4319 | NA            | (20) |

|         |        |                |            |           |             |      |
|---------|--------|----------------|------------|-----------|-------------|------|
| PRD05   | 1260   | NA             | 5185 ± 115 | 5676-6240 | NA          | (63) |
| PRD05   | 1310   | NA             | 5530 ± 180 | 5934-6714 | NA          | (63) |
| PRD05   | 1380   | NA             | 6380 ± 135 | 6960-7525 | NA          | (20) |
| PRD05   | 1510   | NA             | 6450 ± 180 | 6952-7658 | NA          | (20) |
| PRD05   | 1610   | NA             | 7000 ± 155 | 7583-8141 | NA          | (20) |
| PRD05   | 1820   | NA             | 7570 ± 180 | 8029-8874 | NA          | (20) |
| PRD16   | 360    | NA             | 1437 ± 70  | 1223-1510 | NA          | (22) |
| PRD16   | 540    | NA             | 1574 ± 100 | 1312-1697 | NA          | (22) |
| PRD16   | 600    | NA             | 1746 ± 100 | 1426-1885 | NA          | (22) |
| PRD16   | 720    | NA             | 1766 ± 100 | 1438-1906 | NA          | (22) |
| PRD16   | 850    | NA             | 2127 ± 100 | 1892-2326 | NA          | (22) |
| PRD16   | 940    | NA             | 3873 ± 150 | 3890-4773 | NA          | (22) |
| PRD16   | 1031   | NA             | 6913 ± 140 | 7520-7996 | NA          | (22) |
| QZK4    | 426    | Shell          | 1265 ± 20  | 757-872   | BA 110961   | (24) |
| QZK4    | 522.5  | Oyster shell   | 3400 ± 30  | 3200-3342 | BA 120122   | (24) |
| QZK4    | 587.5  | Oyster shell   | 4595 ± 40  | 4707-4899 | BA 120123   | (24) |
| QZK4    | 612.5  | Foraminifera   | 5410 ± 40  | 5693-5880 | Beta 344887 | (24) |
| QZK4    | 637.5  | Oyster shell   | 5270 ± 35  | 5578-5699 | BA 120124   | (24) |
| QZK4    | 787.5  | Foraminifera   | 6880 ± 40  | 7316-7459 | Beta 344888 | (24) |
| QZK1    | 438    | Silt           | 2545 ± 30  | 2507-2743 | BA 110947   | (24) |
| QZK1    | 868    | Charcoal       | 7170 ± 35  | 7944-8025 | BA 110948   | (24) |
| QZK1    | 902.5  | Foraminifera   | 8250 ± 40  | 8639-8931 | Beta 344884 | (24) |
| QZK1    | 987.5  | Foraminifera   | 8440 ± 40  | 8965-9144 | Beta 344885 | (24) |
| QZK1    | 1112.5 | Foraminifera   | 8300 ± 40  | 8731-8977 | Beta 344886 | (24) |
| QZK1    | 1305   | Wood           | 8065 ± 35  | 8799-9074 | BA 110950   | (24) |
| ZK201-2 | 830    | Shell          | 1510 ± 20  | 1003-1120 | BA 130366   | (25) |
| ZK201-2 | 1415   | Bivalve        | 7730 ± 40  | 8123-8299 | Beta 366008 | (25) |
| ZK201-2 | 2203   | Plant fragment | 7855 ± 35  | 8568-8761 | BA 130367   | (25) |
| ZK201-2 | 2209   | Plant fragment | 7890 ± 35  | 8603-8935 | BA 130368   | (25) |
| ZK201-2 | 3477   | Plant fragment | 8170 ± 40  | 9022-9252 | Beta 366009 | (25) |
| ZK203-2 | 500    | Shell          | 3040 ± 25  | 2753-2849 | BA 130369   | (25) |
| ZK203-2 | 992    | Plant fragment | 7120 ± 30  | 7877-7995 | BA 130370   | (25) |
| ZK13    | 177    | Silt           | 1565 ± 20  | 1409-1521 | BA 131898   | (26) |
| ZK13    | 648    | Shell          | 1740 ± 30  | 1249-1338 | BA 131900   | (26) |
| ZK13    | 1154   | Silt           | 3190 ± 25  | 3372-3451 | BA 131902   | (26) |
| ZK13    | 1438   | Crab shell     | 6870 ± 40  | 7308-7450 | BA 131903   | (26) |
| ZK13    | 1785   | Oyster shell   | 8140 ± 45  | 8506-8749 | BA 131904   | (26) |
| ZK201   | NA     | Bulk organic   | 4610 ± 180 | 4858-5676 | NA          | (28) |
| ZK201   | NA     | Bulk organic   | 6920 ± 110 | 7590-7951 | NA          | (28) |
| M3      | NA     | Bulk organic   | 6250 ± 80  | 6955-7363 | NA          | (29) |

|       |      |                 |            |           |             |      |
|-------|------|-----------------|------------|-----------|-------------|------|
| D13   | 670  | Bulk organic    | 4210 ± 100 | 4466-5020 | KWG-744     | (30) |
| M184  | 250  | Bulk organic    | 1740 ± 75  | 1461-1839 | KWG-1001    | (33) |
| M184  | 780  | Bulk organic    | 7200 ± 130 | 7757-8302 | KWG-840     | (33) |
| PK16  | 160  | Bulk organic    | 2670 ± 85  | 2510-2978 | KWG-100     | (30) |
| PK16  | 1290 | Plant fragment  | 6150 ± 160 | 6664-7386 | GC-520      | (30) |
| D6    | 1860 | Bulk organic    | 2350 ± 90  | 2158-2702 | KWG-49      | (31) |
| JT81  | 390  | Bulk organic    | 1310 ± 65  | 1076-1326 | KWG-693     | (30) |
| JT81  | 590  | Bulk organic    | 2430 ± 90  | 2336-2739 | KWG-690     | (30) |
| JT81  | 1070 | Bulk organic    | 3840 ± 95  | 3982-4499 | KWG-700     | (30) |
| JT81  | 1490 | Plant fragment  | 7390 ± 140 | 7946-8427 | KWG-890     | (30) |
| E3    | 1400 | Bulk organic    | 5710 ± 130 | 6274-6812 | KWG-272     | (33) |
| PRD10 | 610  | NA              | 2685 ± 150 | 2392-3177 | NA          | (38) |
| PRD10 | 920  | NA              | 2820 ± 140 | 2613-3320 | NA          | (38) |
| PRD10 | 990  | NA              | 3235 ± 120 | 3164-3768 | NA          | (38) |
| PRD10 | 1160 | NA              | 3540 ± 120 | 3523-4170 | NA          | (38) |
| PRD10 | 1250 | NA              | 4100 ± 130 | 4244-4920 | NA          | (38) |
| PRD10 | 1340 | NA              | 4820 ± 90  | 5333-5742 | NA          | (38) |
| PRD10 | 1480 | NA              | 4920 ± 150 | 5329-5979 | NA          | (38) |
| PRD10 | 1630 | NA              | 6760 ± 120 | 7439-7852 | NA          | (38) |
| PRD10 | 1800 | NA              | 8130 ± 145 | 8637-9424 | NA          | (38) |
| PRD04 | 420  | NA              | 276 ± 115  | 11-506    | NA          | (19) |
| PRD04 | 790  | NA              | 426 ± 100  | 184-627   | NA          | (19) |
| PRD04 | 900  | NA              | 889 ± 100  | 674-1002  | NA          | (19) |
| PRD04 | 1490 | NA              | 1685 ± 110 | 1368-1862 | NA          | (19) |
| PRD04 | 1570 | NA              | 2504 ± 115 | 2327-2816 | NA          | (19) |
| PRD04 | 1700 | NA              | 3926 ± 125 | 4004-4782 | NA          | (19) |
| PRD04 | 1820 | NA              | 4531 ± 130 | 4872-5548 | NA          | (19) |
| PRD04 | 2190 | NA              | 5060 ± 100 | 5617-6042 | NA          | (19) |
| PRD04 | 2340 | NA              | 5351 ± 115 | 5885-6361 | NA          | (19) |
| PRD04 | 2630 | NA              | 6522 ± 180 | 7002-7722 | NA          | (19) |
| PRD04 | 2750 | NA              | 8025 ± 100 | 8618-9218 | NA          | (19) |
| NB    | 1100 | Wood            | 1270 ± 40  | 1086-1280 | Beta 164797 | (35) |
| NB    | 1670 | Jointed Bivalve | 1730 ± 40  | 1211-1351 | Beta 164799 | (35) |
| NB    | 2240 | Bivalve         | 2150 ± 40  | 1631-1832 | Beta 164800 | (35) |
| NB    | 2480 | Bivalve         | 2210 ± 40  | 1710-1891 | Beta 164801 | (35) |
| NB    | 2760 | Jointed Bivalve | 2640 ± 40  | 2218-2428 | Beta 164802 | (35) |
| NB    | 3040 | Jointed Bivalve | 3320 ± 40  | 3055-3285 | Beta 164803 | (35) |
| NB    | 3180 | Bivalve         | 3860 ± 40  | 3704-3920 | Beta 164804 | (35) |
| NB    | 3410 | Bivalve         | 5650 ± 40  | 5952-6161 | Beta 164805 | (35) |
| NB    | 3470 | Bivalve         | 5740 ± 40  | 6054-6258 | Beta 164806 | (35) |

|       |      |                 |             |            |             |      |
|-------|------|-----------------|-------------|------------|-------------|------|
| NB    | 3860 | Jointed Bivalve | 9010 ± 40   | 9545-9807  | Beta 164807 | (35) |
| HV    | 1300 | Bivalve         | 1420 ± 40   | 901-1046   | Beta 164829 | (35) |
| HV    | 1620 | Crab shell      | 1680 ± 40   | 1170-1295  | Beta 164830 | (36) |
| HV    | 1930 | Jointed bivalve | 1800 ± 40   | 1271-1413  | Beta 164831 | (36) |
| HV    | 2250 | Bivalve         | 2870 ± 40   | 2514-2728  | Beta 164832 | (35) |
| HV    | 2540 | Wood            | 3510 ± 40   | 3675-3883  | Beta 164834 | (35) |
| HV    | 2780 | Bivalve         | 4410 ± 40   | 4438-4695  | Beta 164835 | (35) |
| PIT1  | 110  | Bivalvia        | 1210 ± 100  | 598-952    | Beta 120475 | (36) |
| PIT1  | 325  | Bivalvia        | 2070 ± 40   | 1543-1731  | Beta 137879 | (36) |
| PIT1  | 570  | Bivalvia        | 2440 ± 60   | 1941-2265  | Beta 137880 | (36) |
| PIT1  | 900  | Bivalvia        | 3290 ± 50   | 2975-3254  | Beta 137878 | (36) |
| PIT1  | 1270 | Bivalvia        | 3930 ± 40   | 3823-4035  | Beta 115346 | (36) |
| PIT1  | 1350 | Bivalvia        | 4990 ± 200  | 4818-5737  | Beta 115345 | (36) |
| SITE3 | 155  | Wood fragment   | 170 ± 60    | 6-311      | Beta 130671 | (36) |
| SITE3 | 275  | Wood fragment   | 190 ± 40    | 3-297      | Beta 130672 | (36) |
| SITE3 | 812  | Clam            | 1410 ± 40   | 894-1041   | Beta 132937 | (36) |
| SITE3 | 1210 | Clam            | 3170 ± 50   | 2836-3103  | Beta 130677 | (36) |
| TV1   | 262  | Shell           | 1190 ± 40   | 661-808    | Beta 132928 | (37) |
| TV1   | 456  | Shell           | 1190 ± 40   | 661-808    | Beta 132929 | (37) |
| TV1   | 652  | Shell           | 1470 ± 40   | 935-1121   | Beta 132930 | (37) |
| TV1   | 865  | Shell           | 1870 ± 40   | 1332-1509  | Beta 132931 | (37) |
| TV1   | 1038 | Shell           | 2000 ± 40   | 2464-2665  | Beta 132932 | (37) |
| TV1   | 1244 | Shell           | 2230 ± 40   | 1730-1921  | Beta 132933 | (37) |
| TV1   | 1656 | Shell           | 2350 ± 40   | 1876-2079  | Beta 132934 | (37) |
| TV1   | 2143 | Shell           | 2930 ± 40   | 2626-2770  | Beta 132935 | (37) |
| BT3   | 494  | Shell           | 1300 ± 90   | 682-1032   | NUTA-6543   | (37) |
| BT3   | 1209 | Shell           | 1620 ± 90   | 975-1327   | NUTA-6536   | (37) |
| BT3   | 2145 | Shell           | 4030 ± 70   | 3858-4238  | NUTA-6539   | (37) |
| PD    | 99   | NA              | 2460 ± 100? | 2340-2749  | NA          | (17) |
| PD    | 688  | NA              | 3160 ± 100? | 3094-3593  | NA          | (17) |
| PD    | 740  | NA              | 3730 ± 100? | 3834-4391  | NA          | (17) |
| JT    | 600  | NA              | 3100 ± 30   | 3233-3373  | NA          | (18) |
| JT    | 700  | NA              | 3500 ± 30   | 3695-3843  | NA          | (18) |
| CH2   | 876  | Bulk organic    | 3063 ± 88   | 3009-3445  | NA          | (3)  |
| CH2   | 1123 | Bulk organic    | 8555 ± 288  | 8787-10273 | NA          | (3)  |

**Dataset S1** (separate file). Pollen data for sites FZ5, NA9, Longpu and SH-1

### SI References

1. K. Saito, T. Oguchi, Slope of alluvial fans in humid regions of Japan, Taiwan and the Philippines. *Geomorphology* **70**, 147-162 (2005).
2. R. T. Day, P. A. Keddy, J. McNeill, T. Carleton, Fertility and disturbance gradients: a summary model for riverine marsh vegetation. *Ecology* **69**, 1044-1054 (1988).
3. Y. Yue, et al, Holocene vegetation, environment and anthropogenic influence in the Fuzhou Basin, southeast China. *J. Asian Earth Sci.* **99**, 85-94 (2015).
4. Z. Zheng, Q. Li, Vegetation, climate, and sea level in the past 55,000 years, Hanjiang Delta, southeastern China. *Quat. Res.* **53**, 330-340 (2000).
5. Z. Zheng, Y. Deng, H. Zhang, R. Yu, Z. Chen, Holocene environmental changes in tropical and subtropical areas of south China and the relation to human activities. *Quat. Sci.* **24**, 387-393 (2004).
6. K. Huang, et al., Holocene paleoenvironment reconstruction based on pollen data in the Sanshui Basin, Northern Pearl River Delta. *Trop. Geogr.* **36**, 364-373 (2016).
7. P. Li, G. Fang, G. Huang, Holocene environmental changes in Zhujiang Delta. *Quat. Sci.* **2**, 130-139 (1991).
8. T. Ma, et al., Holocene fire and forest histories in relation to climate change and agriculture development in southeastern China. *Quat. Int.* **488**, 30-40 (2018).
9. S. Yang, et al., Modern pollen assemblages from cultivated rice fields and rice pollen morphology: Application to a study of ancient land use and agriculture in the Pearl River Delta, China. *Holocene* **22**, 1393-1404 (2012).
10. J. Wang, et al., The Holocene spore-pollen characteristics of Core GZ-2 in Pearl River Delta and their paleoenvironmental significance. *J. Palaeogeogr.* **11**, 661-669 (2009).
11. Z. Zheng, Study of human disturbance to the vegetation in recent thousands of years in the coastal areas of Southeast China. *Ecol. Sci.* **17**, 29-36 (1998).
12. Z. Li, Y. Saito, P. X. Dang, E. Matsumoto, L. V. Quang, Warfare rather than agriculture as a critical influence on fires in the late Holocene, inferred from northern Vietnam. *PNAS* **106**, 11490-11495 (2009).
13. Z. Li, et al., Climate change and human impact on the Song Hong (Red River) Delta, Vietnam, during the Holocene. *Quat. Int.* **144**, 4-28 (2006).
14. J. Stevenson, F. Siringan, J. A. N. Finn, D. Madulid, H. Heijnis, Paoay Lake, northern Luzon, the Philippines: a record of Holocene environmental change. *Global Change Biol.* **16**, 1672-1688 (2010).
15. B. K. Maloney, J. J. Mcalister, Khok Phanom Di, central Thailand: Chemical analysis of pollen core KL 2 and AMS radiocarbon dates from cores KL 2 and BMR 2. *Geoarchaeology* **5**, 375-382 (1990).
16. B. K. Maloney, Khok Phanom Di, central Thailand: The environmental setting. *Geoarchaeology* **3**, 287-292 (1988).
17. U. Proske, et al., The palaeoenvironmental development of the northeastern Vietnamese Mekong River Delta since the mid Holocene. *Holocene* **20**, 1257-1268 (2010).
18. F. Gao, X. Yang, Y. Dong, Q. Liang, W. Zhou, Carbon nitrogen record in sediments of core PD in the Pearl River Delta and the environmental significance. *Mar. Geol. Quat. Geol.* **26**, 33-39 (2006).
19. Z. Yu, "The age of the lower transgression cycle in the Pearl River Delta and its implication for sea-level changes and neotectonic movements", thesis, Sun Yat-Sen University (2017).
20. Y. Dong, et al., Late Quaternary paleontology and environmental changes in Da'ao Plain, middle Pearl River Delta, southern China. *Quat. Sci.* **32**, 1183-1198 (2012).



21. C. Liu, et al., High resolution ostracod records of borehole PRD05 and the Late Quaternary palaeoenvironment of the Pearl River Delta. *J. Palaeogeogr.* **10**, 313-322 (2008).
22. C. Liu, J. Wu, T. Yang, F. T. Fürsich, S. Zhang, Rare earth element records from core sediments of southern Pearl River Delta: Geochemical response to palaeoenvironmental changes during the Late Quaternary. *J. Palaeogeogr.* **13**, 221-228 (2011).
23. C. Zhuang, C. Liu, J. Wu, T. Yang, J. Yin, Microfossil records of Borehole RPD16 and the palaeoenvironment of the Pearl River Delta since the Late Pleistocene. *Acta Sci. Nat. Univ. SYSU* **52**, 128-138 (2013).
24. J. Yin, C. Liu, J. Wu, Y. Huang, Y. Wu, Foraminifera records and palaeoenvironmental change since the Late Pleistocene in the central Pearl River Delta. *J. Palaeogeogr.* **18**, 677-690 (2016).
25. S. Chen, et al., Micropaleontological records of Late Quaternary transgression in the Modern Pearl River Delta region, Guangdong Province, South China. *Acta Micropalaeontol. Sin.* **32**, 292-307 (2015).
26. Y. Xie, et al., Transgressive sequence since the Late Pleistocene in Xiaolan Town - Wanqingsha area, Zhujiang River estuary. *J. Palaeogeogr.* **16**, 835-852 (2014).
27. X. Zhao, et al., Late Quaternary evolution history shown by Borehole ZK13 in Pearl River Delta, based on chronology and micropaleontology. *Geol. Bull. China* **35**, 1724-1733 (2016).
28. Y. Tang, Z. Zheng, C. Chen, M. Wang, B. Chen, Evolution of the Lian River coastal basin in response to Quaternary marine transgressions in Southeast China. *Sediment. Geol.* **366**, 1-13 (2018).
29. S. Han, J. Zhang, Quaternary stratigraphic division and marine bed analysis of Mawei area, Fuzhou. *Mar. Geol. Quat. Geol.* **12**, 85-95 (1992).
30. J. Yang, D. Hua, L. Wu, Sporopollen, foraminifera and diatom assemblages of Quaternary strata in the Minjiang River Estuary and their paleogeographical significance. *Mar. Geol. Quat. Geol.* **11**, 75-82 (1991).
31. Y. Zong, G. Huang, A. D. Switzer, F. Yu, W. W. S. Yim, An evolutionary model for the Holocene formation of the Pearl River Delta, China. *Holocene* **19**, 129-142 (2009).
32. Y. Zong, W. W. S. Yim, F. Yu, G. Huang, Late Quaternary environmental changes in the Pearl River mouth region, China. *Quat. Int.* **206**, 35-45 (2009).
33. Y. Zong, et al., Changes in sea level, water salinity and wetland habitat linked to the late agricultural development in the Pearl River Delta plain of China. *Quat. Sci. Rev.* **70**, 145-157 (2013).
34. Y. Zong, Postglacial stratigraphy and sea -level changes in the Han River Delta, China. *J. Coast. Res.* **8**, 1-28 (1992).
35. B. P. Horton, et al., Holocene sea levels and palaeoenvironments, Malay-Thai Peninsula, southeast Asia. *Holocene* **15**, 1199-1213 (2005).
36. S. Tanabe, et al., Holocene evolution of the Song Hong (Red River) Delta system, northern Vietnam. *Sediment. Geol.* **187**, 29-61 (2006).
37. S. Tanabe, et al., Stratigraphy and Holocene evolution of the mud-dominated Chao Phraya Delta, Thailand. *Quat. Sci. Rev.* **22**, 789-807 (2003).
38. T. K. O. Ta, et al., Holocene delta evolution and sediment discharge of the Mekong River southern Vietnam. *Quat. Sci. Rev.* **21**, 1807-1819 (2002).
39. X. Wei, C. Wu, Holocene delta evolution and sequence stratigraphy of the Pearl River Delta in South China. *Sci. China D Earth Sci.* **54**, 1523-1541 (2011).
40. B. V. Rolett, Z. Zheng, Y. Yue, Holocene sea-level change and the emergence of Neolithic seafaring in the Fuzhou Basin (Fujian, China). *Quat. Sci. Rev.* **30**, 788-797 (2011).
41. P. Ding, et al., Carbon isotopic composition and its implications on paleoclimate of the underground ancient forest ecosystem in Sihui, Guangdong. *Sci. China D Earth Sci.* **52**, 638-646 (2009).
42. P. Ding, et al., <sup>14</sup>C Chronological research of ancient forest ecosystem in Sihui, Guangdong Province. *Quat. Sci.* **27**, 492-498 (2007).
43. Y. Zhang, S. Yu, Late Quaternary palynological assemblages and paleoenvironment evolution of the Shenzhen region. *Mar. Geol. Quat. Geol.* **19**, 109-114 (1999).
